# Supplementary material
Source: PubMed Central journal article supplement (PMC518760)

A

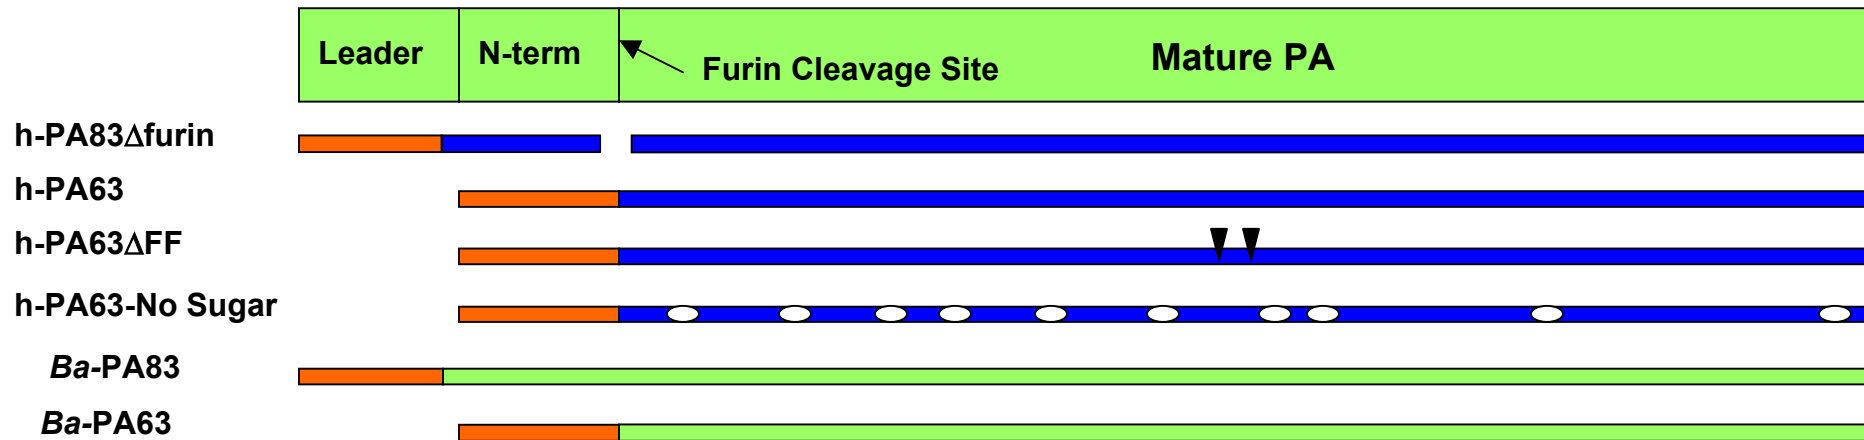

**B**

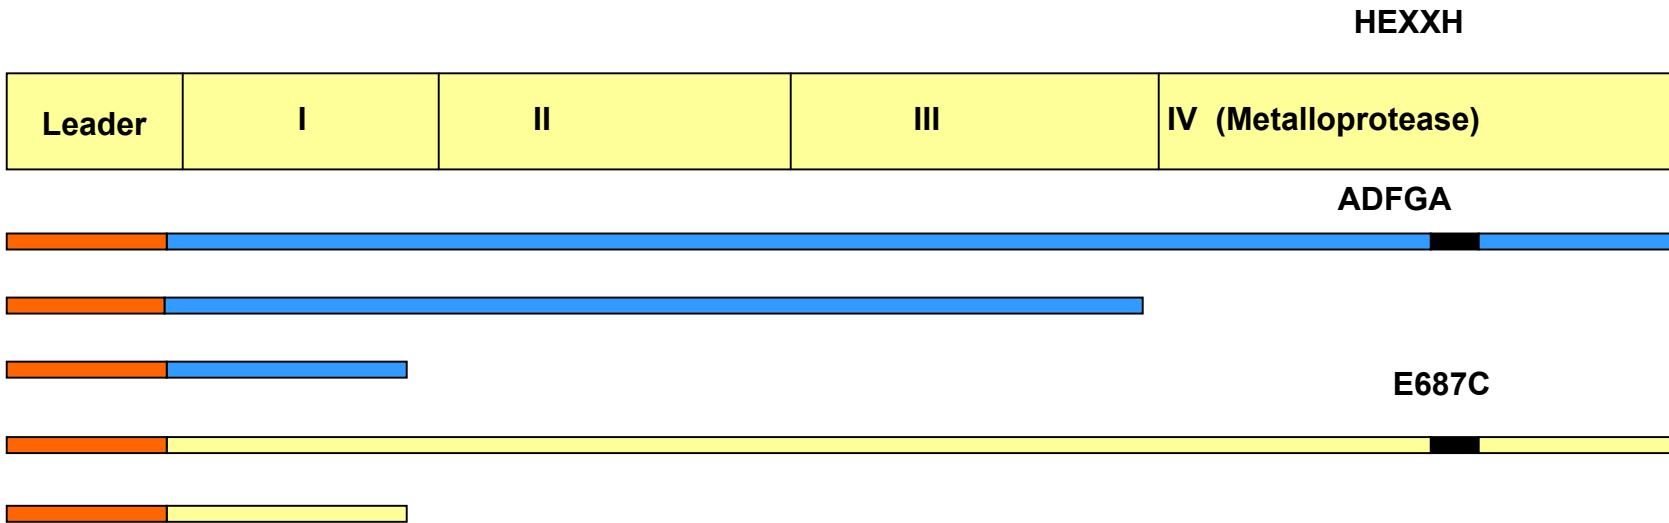

Supplement: pnas_101_37_13601__1.pdf [file pnas_101_37_13601__1.pdf]

A

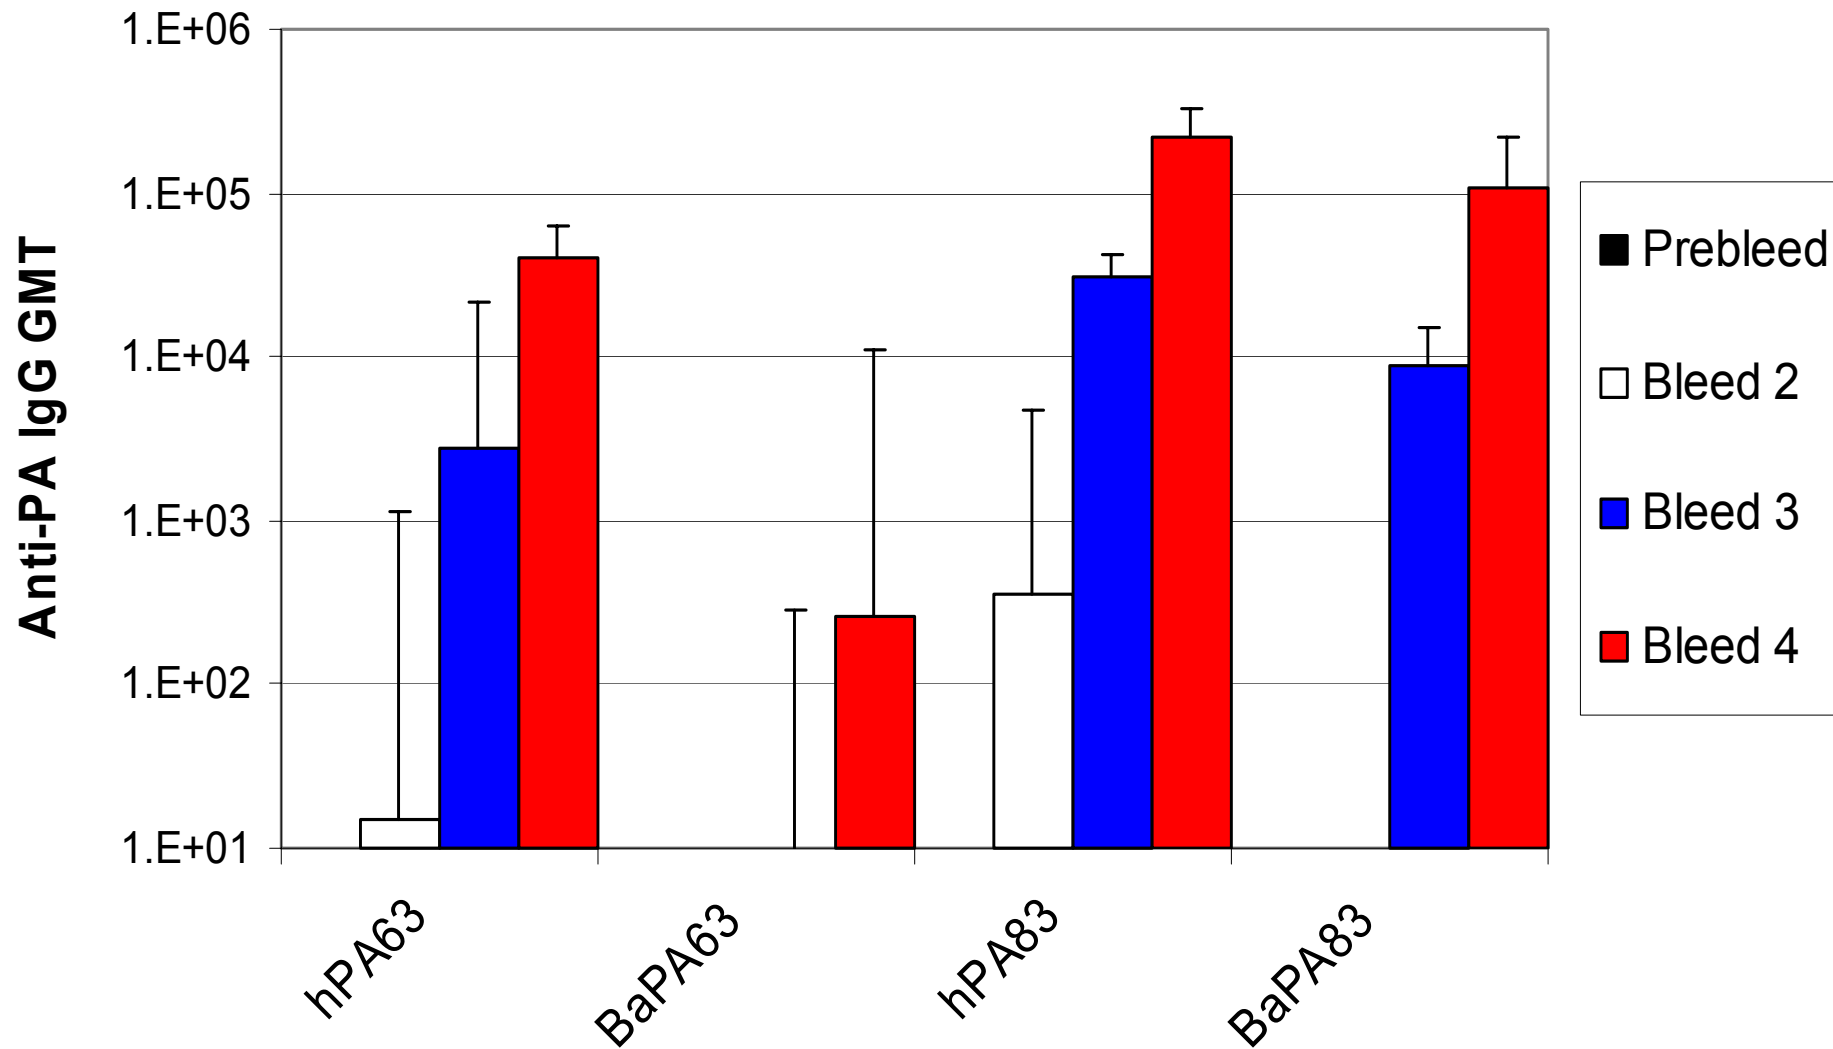

**B**

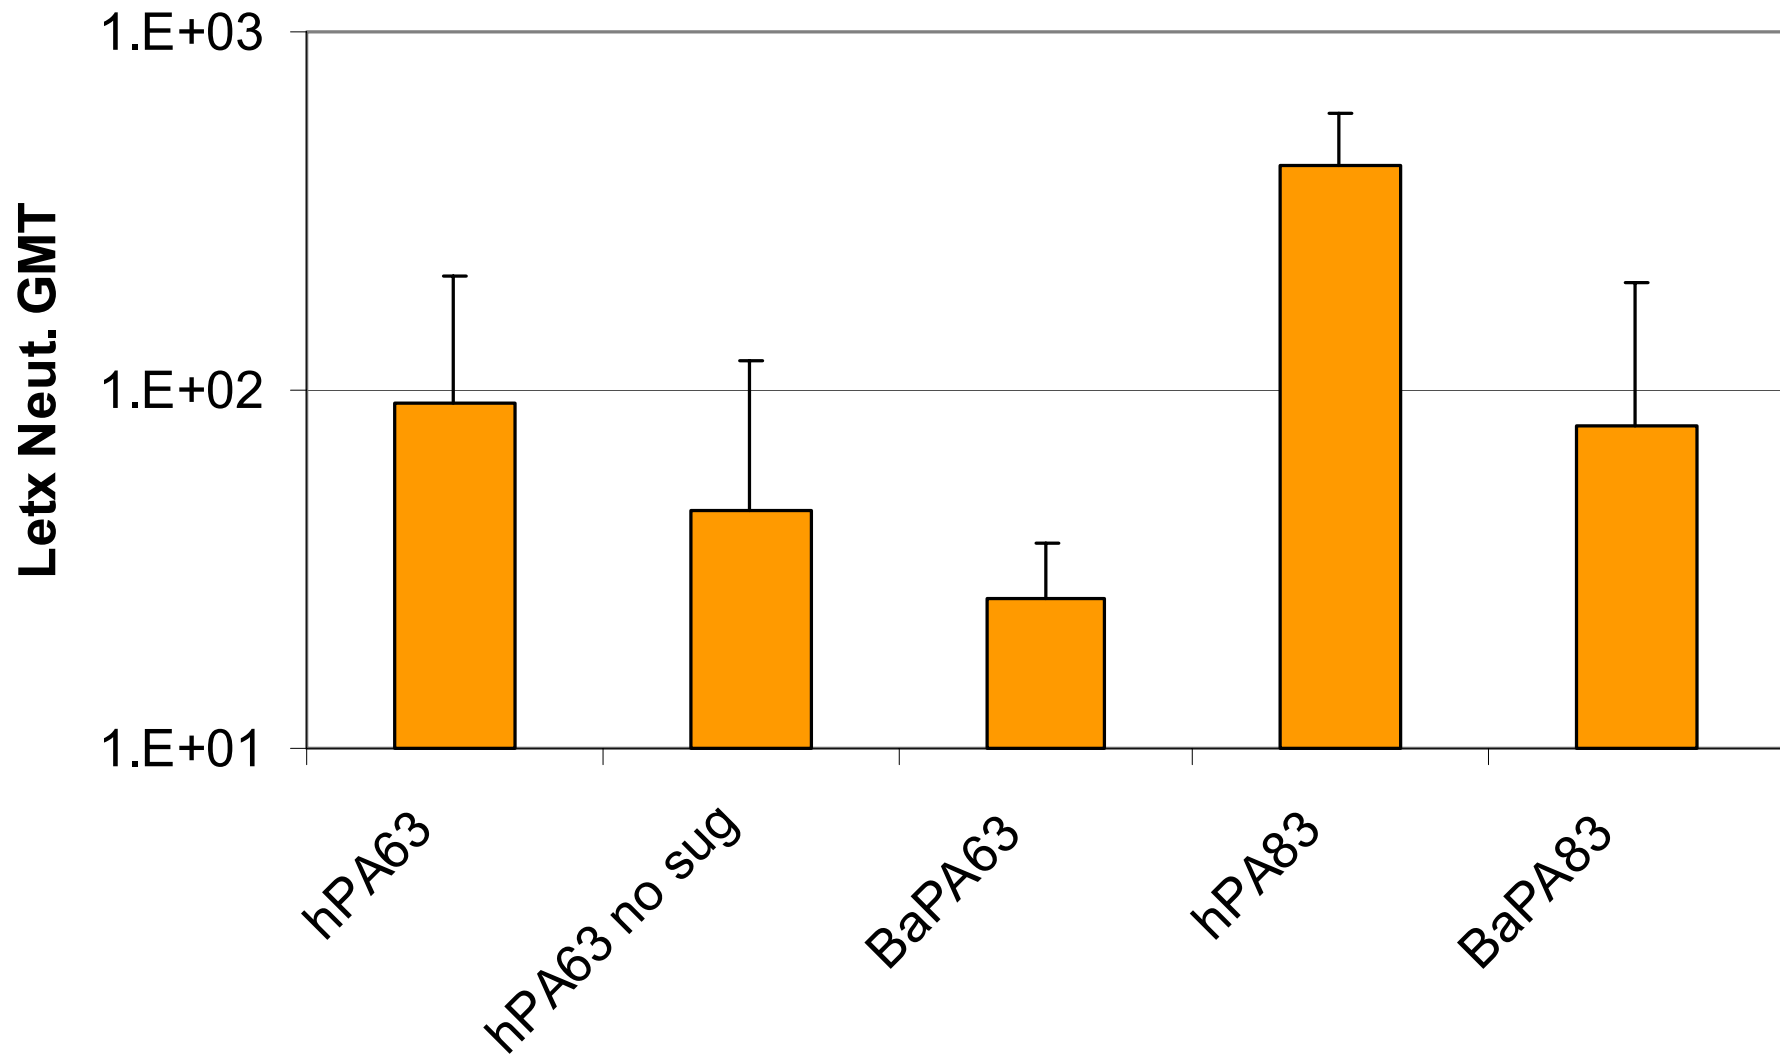

Supplement: pnas_101_37_13601__3.pdf [file pnas_101_37_13601__3.pdf]
